# Supplementary material for: Room-temperature spin-conserved electron transport to semiconductor quantum dots using a superlattice barrier
Source: Royal Society of Chemistry journal article supplement (doi:10.1039/d4cp03973d), 2025-01-01
Supplement: d4cp03973d1.pdf [file d4cp03973d1.pdf]

## Supplementary information

### **Room-temperature spin-conserved electron transport to semiconductor quantum dots using a superlattice barrier**

Satoshi Hiura<sup>1\*</sup>, Saeko Hatakeyama<sup>1</sup>, Mattias Jansson<sup>2</sup>, Junichi Takayama<sup>1</sup>, Irina Buyanova<sup>2</sup>, Weimin Chen<sup>2</sup>, and Akihiro Murayama<sup>1</sup>

*<sup>1</sup>Faculty of Information Science and Technology, Hokkaido University, Sapporo 060-0814, Japan*

*<sup>2</sup>Department of Physics, Chemistry and Biology, Linköping University, 58183 Linköping, Sweden*

\*Correspondence: [hiura@ist.hokudai.ac.jp](mailto:hiura@ist.hokudai.ac.jp)

## Note S1. Rate equation analysis

In this study, we performed a rate equation analysis to examine the electron transport time to the QDs. This rate equation model includes transport and relaxation processes of excitons initially generated in the GaAs QW around the QDs or in the SL barrier. The initial number of excitons can be expressed by  $N_0$ . The rate equation can be written as follows:

$$\frac{dN_{QW(SL)}}{dt} = \frac{-N_{QW(SL)}}{\tau_{tr}} \left( 1 - \frac{N_{QD}}{D_{QD}} \right), \quad (S1)$$

$$\frac{dN_{QD}}{dt} = \frac{N_{QW(SL)}}{\tau_{tr}} \left( 1 - \frac{N_{QD}}{D_{QD}} \right) - \frac{N_{QD}}{\tau_r}, \quad (S2)$$

where the generated excitons are transported to the QD states with a time constant of  $\tau_{tr}$  and relax with a time constant of  $\tau_r$ . Here, the parameter  $\tau_r$  can be expressed by the radiative and nonradiative decay processes, as follows:

$$\frac{1}{\tau_r} = \frac{1}{\tau_{rad}} + \frac{1}{\tau_{nr}}, \quad (S3)$$

where  $\tau_{nr}$  includes the trapping by the defects, energy relaxation into the lower-energy QD states and thermal escape from the QDs. A state-filling effect is also considered in this model. If the QD states are fully occupied, the population of the states ( $N_{QD}$ ) is equal to the density of the states ( $D_{QD}$ ). In this case, the carrier injection stops. This situation can be expressed by introducing the parameter  $1 - N_{QD}/D_{QD}$ .
